# Supplementary material for: Neoantigen-specific T cell help outperforms non-specific help in multi-antigen DNA vaccination against cancer
Source: PubMed Central journal article supplement (PMC11261851; doi:10.1016/j.omton.2024.200835), 2024-06-15
Supplement: mmc1.pdf [file mmc1.pdf]

**Supplemental information**

**Neoantigen-specific T cell help outperforms**

**non-specific help in multi-antigen**

**DNA vaccination against cancer**

**Joanna Frédérique de Graaf, Tamara Pesic, Felicia S. Spitzer, Koen Oosterhuis, Marcel G.M. Camps, Iris Zoutendijk, Bram Teunisse, Wahwah Zhu, Tsolere Arakelian, Gerben C. Zondag, Ramon Arens, Jeroen van Bergen, and Ferry Ossendorp**

# Supplemental information

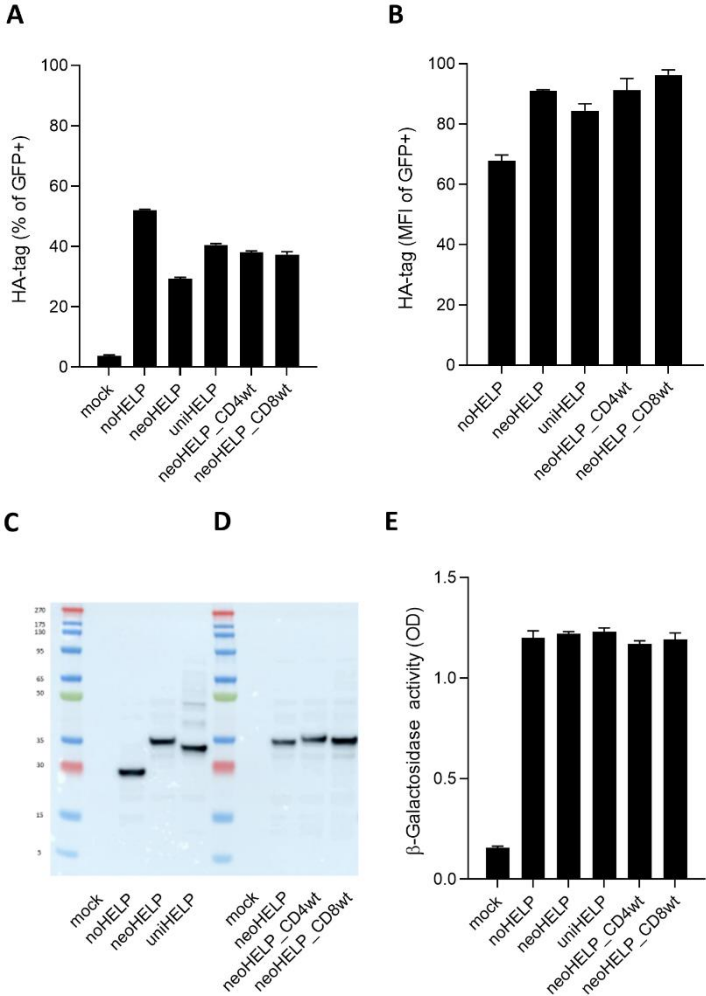

**Figure S1. Verification of vaccine constructs.** (A-B) HEK293T cells were transfected with a GFP-encoding plasmid in combination with the indicated vaccine-encoding plasmids. Transfected cells were identified by GFP-expression, and a C-terminal HA-tag allowed detection of multi-antigen vaccine proteins. (A) The fraction (%) of HA-positive cells among transfected (GFP<sup>+</sup>) cells, and (B) their mean fluorescence intensity (MFI) were determined by flow cytometry. The MFI of mock-transfected cells is not shown as these cells – not having been transfected with a plasmid encoding an HA-tagged protein - do not have detectable expression of the HA-tag above background. Bars and whiskers represent means and standard errors (SEM) of triplicates, respectively. (C-D) Western blot detection of HA-tagged (C) noHELP, neoHELP, uniHELP or (D) neoHELP, neoHELP\_CD4wt or neoHELP\_CD8wt in HEK293T cells transfected with the indicated vaccine-encoding plasmids. (E) Recognition of OVA antigen on transfected B16-F10 cells by H-2K<sup>b</sup>/OVA-specific CD8<sup>+</sup> T-cell hybridoma B3Z. beta-galactosidase expression in B3Z cells is controlled by NFAT, allowing detection of TCR-mediated activation by color conversion of CPRG substrate, which results in increased optical density (OD) at 594nm. Bars and whiskers represent means and standard errors (SEM) of triplicates, respectively. All experiments were performed twice, and one representative experiment is shown.

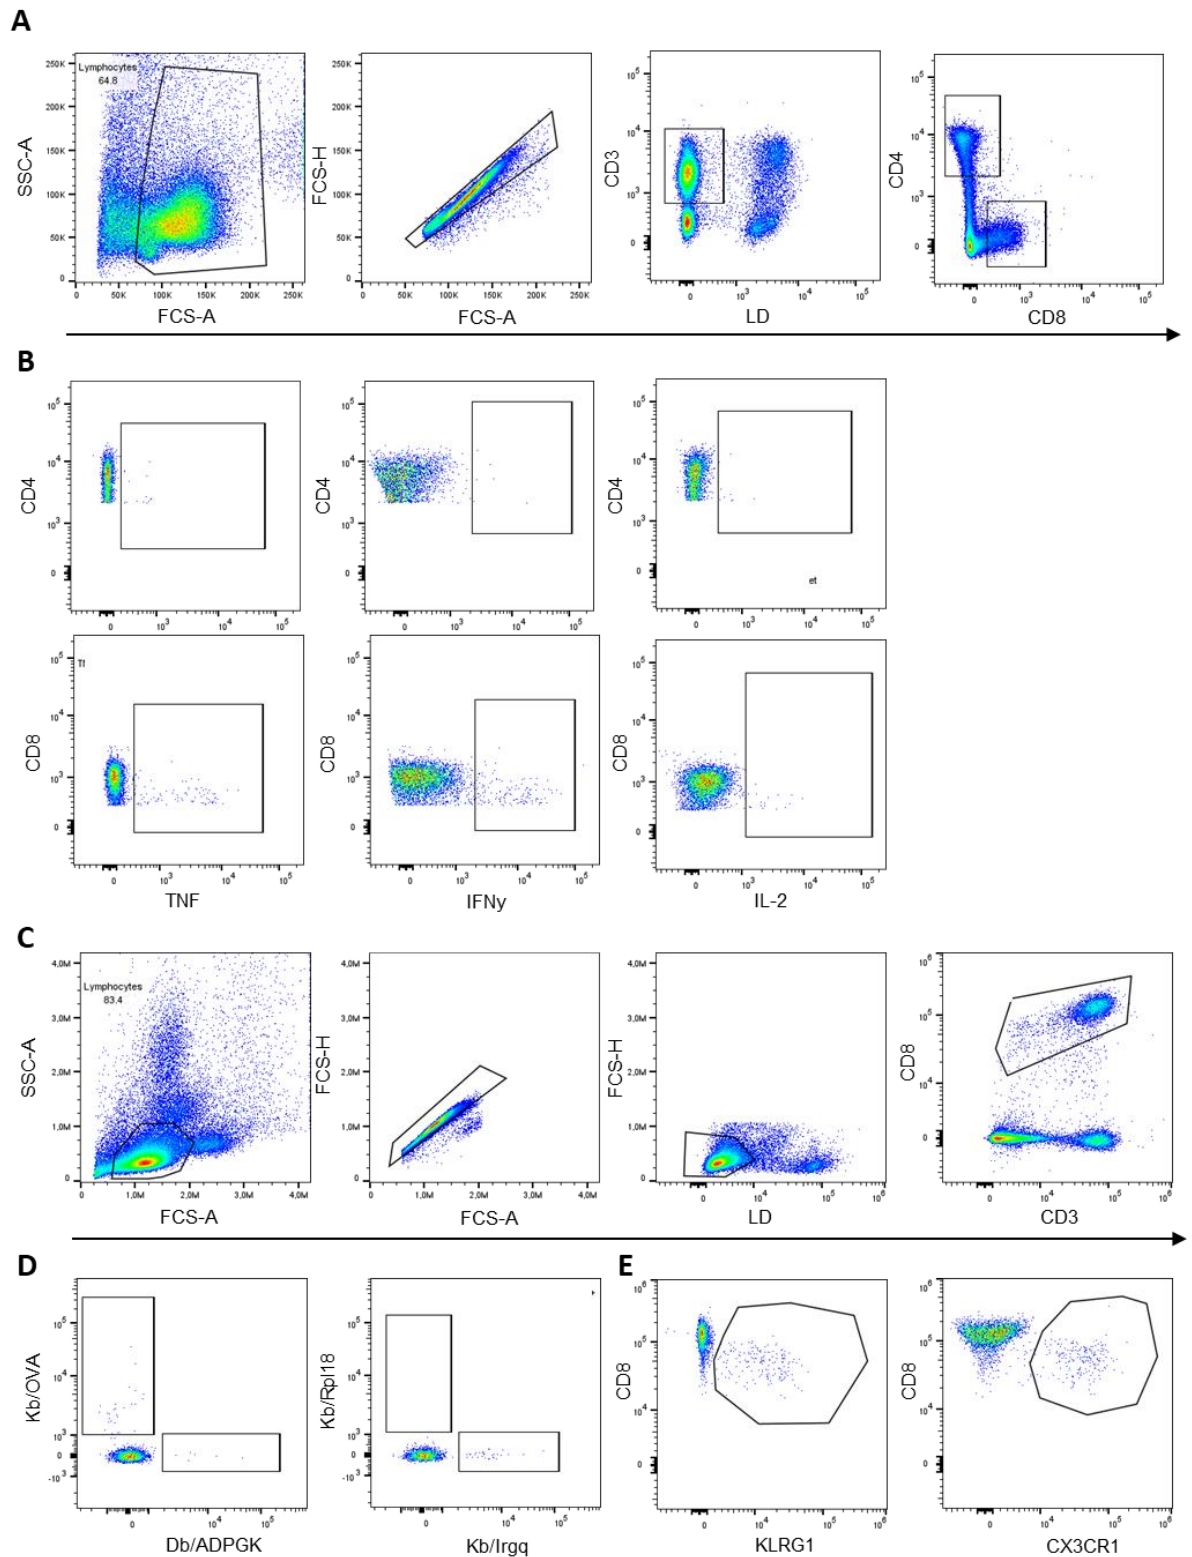

**Figure S2. Gating strategy for flow cytometry analysis.** (A-B) Gating strategy for spleen-derived T-lymphocytes for ICS. (A) Live CD4<sup>+</sup> and CD8<sup>+</sup> T-cells were gated after which (B) TNF-, IFN- $\gamma$ - and IL-2-positive cells were selected. (C-E) Gating strategy for antigen-specific peripheral blood- and spleen-derived T-lymphocytes for surface marker analysis. (C) Gating of live CD8<sup>+</sup> T-cells was followed by (D) selection of tetramer-positive cells. (E) Subsequently, cells positive for specific surface markers were identified.

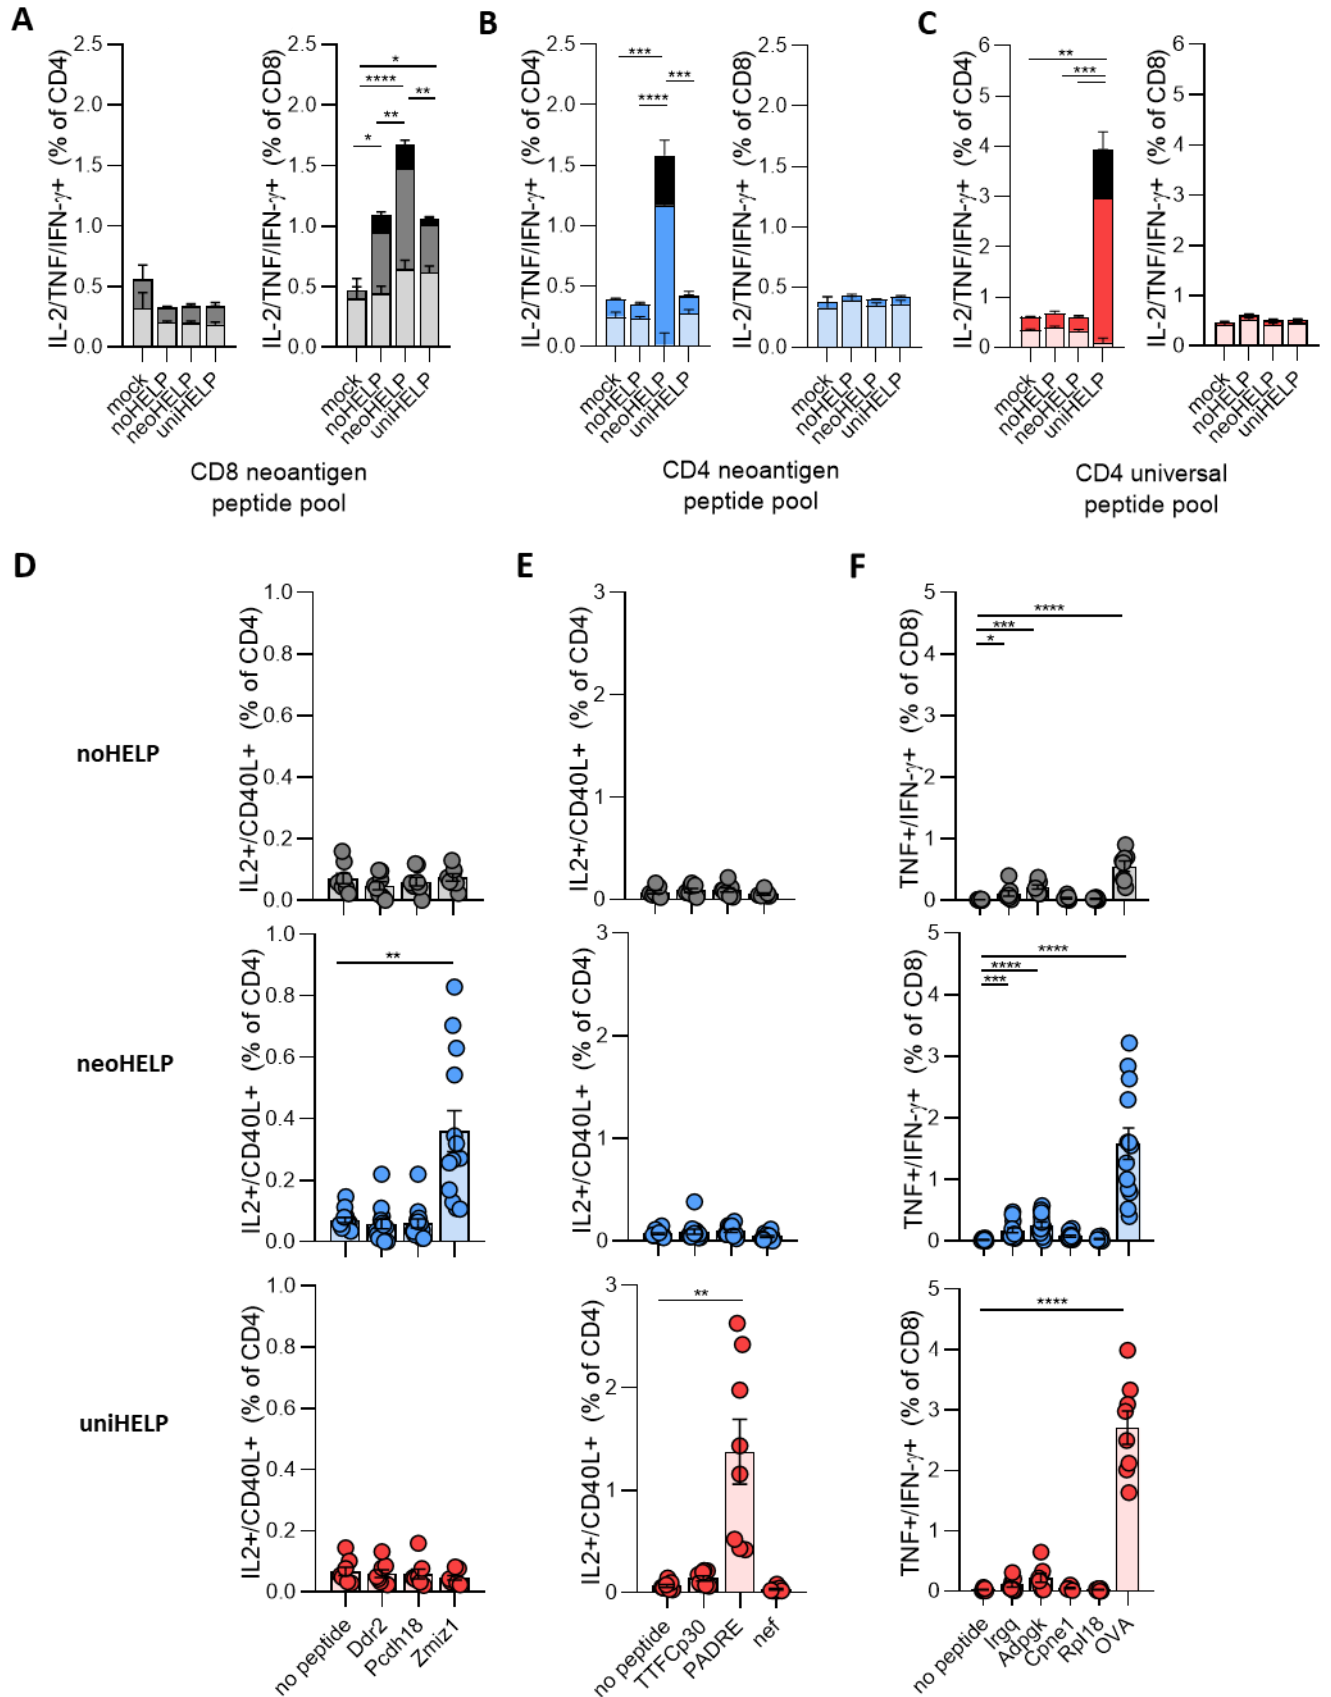

**Figure S3. Antigen-specific CD4<sup>+</sup> and CD8<sup>+</sup> T-cell responses in the spleen of mice.** Mice were vaccinated with the indicated vaccines three times, at three-week intervals. Ten days after the final vaccination, spleen cells were cultured with dendritic cells loaded with indicated (A-C) peptide pools or (D-F) individual peptides for 5 hours, and analyzed by intracellular cytokine staining (ICS). IL-2-, TNF-

and/or IFN- $\gamma$ -positive CD4<sup>+</sup> or CD8<sup>+</sup> T-cells upon stimulation with the indicated peptide pools: (A) CD8 neoantigen peptide pool (Irgq, Adpgk, Cpne1, Rpl18), (B) CD4 neoantigen peptide pool (Ddr2, Pcdh18, Zmiz1), (C) CD4 universal peptide pool (TTFCp30, PADRE, nef). Data are derived from a single experiment with 5 (mock, noHELP, uniHELP) or 10 (neoHELP) mice per group. Data in A-C were analyzed by a two-way ANOVA test followed by Tukey's multiple comparisons test. \* $p < 0.05$ , \*\* $p < 0.01$ , \*\*\* $p < 0.001$ , \*\*\*\* $p < 0.0001$ . (D) Fraction of CD4<sup>+</sup> T-cells expressing IL-2 and CD40L in response to tumor-specific neoantigens Ddr1, Pdch1 and Zmiz1. (E) Fraction of CD4<sup>+</sup> T-cells expressing IL-2 and CD40L in response to tumor-unrelated 'universal' antigens TTFC30, PADRE and HIV-nef58-68 (nef). (F) Fraction of CD8<sup>+</sup> T-cells expressing TNF and IFN- $\gamma$  in response to tumor-specific neoantigens Irgq, Adpgk, Cpne1, Rpl18 and to an ovalbumin-derived reporter antigen (OVA). Data are derived from two independent experiments with 8 (mock, noHELP, uniHELP) or 13 (neoHELP) mice per group in total. Dots represent individual values, bars and whiskers represent means and standard errors (SEM), respectively. Data in D-F were analyzed by a Kruskal-Wallis test followed by Dunnett's multiple comparisons test. \* $p < 0.05$ , \*\* $p < 0.01$ , \*\*\* $p < 0.001$ , \*\*\*\* $p < 0.0001$ .

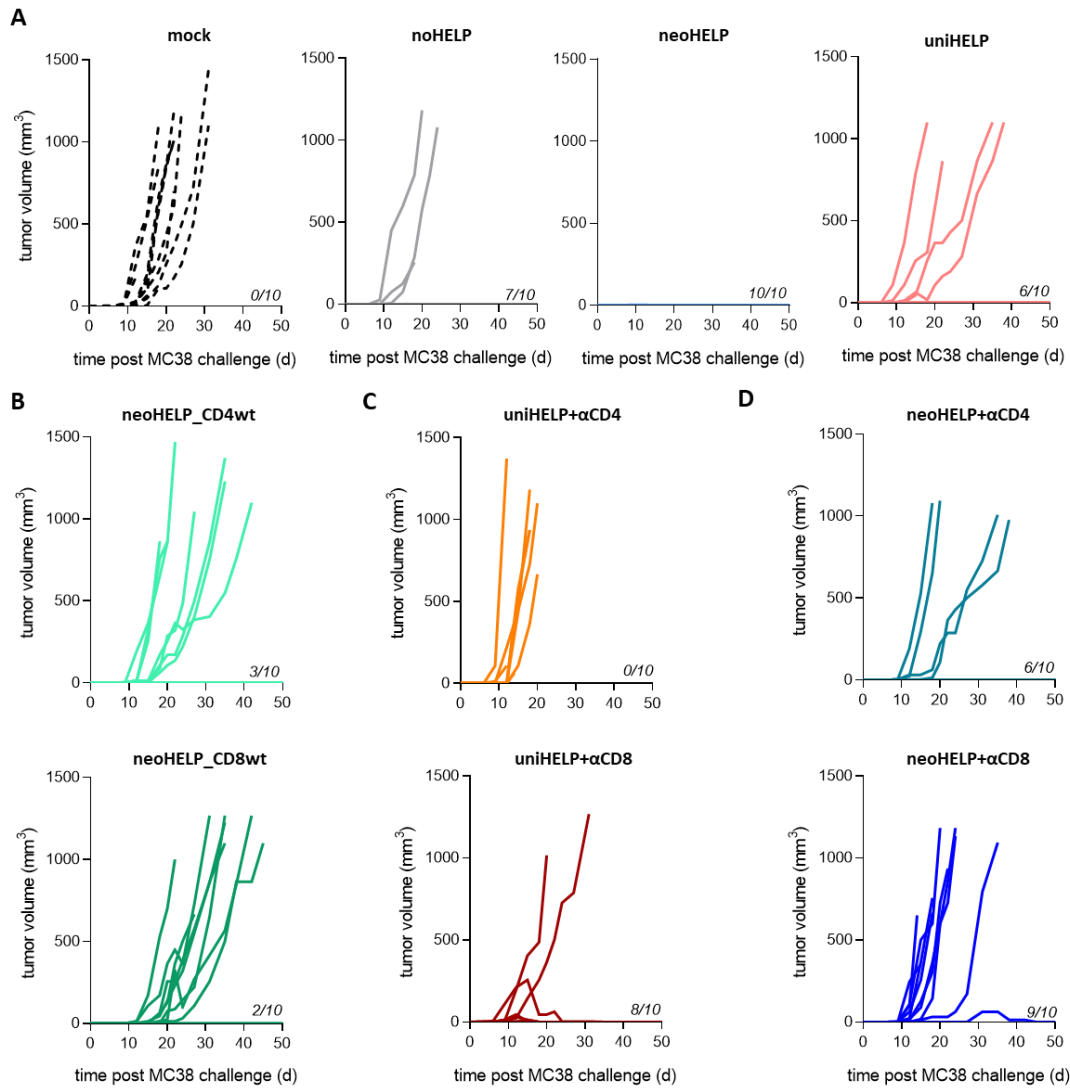

**Figure S4. Tumor growth upon depletion of CD4 and CD8 responses.** Mice (10 mice per group) were vaccinated three times, at 3-week intervals, with the indicated vaccines. Selected groups were depleted of CD4<sup>+</sup> or CD8<sup>+</sup> T-cells by three injections of 100 µg of either α-CD4 (clone GK1.5) or α-CD8 (clone 2.43) on days 57, 61 and 64 post primary vaccination. On day 63 post primary vaccination, mice were injected subcutaneously with 300,000 MC-38 colon carcinoma cells. Lengths and widths of the tumors were measured multiple times a week with a digital caliper to calculate tumor volume. Mice were removed from the experiment if the tumor exceeded 1000 mm<sup>3</sup> or if an ulcer occurred. Mice were vaccinated with (A) saline solution (mock), uniHELP or neoHELP (B) neoHELP vaccines carrying the wild-type counterparts of either the CD4 (neoHELP\_CD4wt) or CD8 (neoHELP CD4wt) T-cell antigens. Additional groups of mice vaccinated with (C) uniHELP and (D) neoHELP underwent CD4<sup>+</sup> or CD8<sup>+</sup> T-cell depletion around the time of tumor challenge. Tumor volumes of individual mice are plotted, and the numbers of tumor-free mice at day 50 post challenge are indicated at the bottom right of each graph.

**Table S1. CD8<sup>+</sup> and CD4<sup>+</sup> T-cell antigens used DNA vaccines**

| Antigen                   | Gene             | Amino Acid (AA) sequence*                      | wt>mt (AA) | MHC-restriction   |
|---------------------------|------------------|------------------------------------------------|------------|-------------------|
| Irgq <sup>43,46</sup>     | <i>Irgq</i>      | QNAAKARDETA <b>AALLNSAVL</b> LGAAPLFVPPADCSSSD | G>V        | H2-D <sup>b</sup> |
| Adpgk <sup>43-46,49</sup> | <i>Adpgk</i>     | DIPTGIPVHLEL <b>ASMTNMELM</b> SIVHQQVFPTVAS    | R>M        | H2-D <sup>b</sup> |
| Cpne1 <sup>43,46,49</sup> | <i>Cpne1</i>     | FTVGVDFTGSNGDP <b>SSPYSLH</b> YLSPTGVNEYLTAL   | D>Y        | H2-D <sup>b</sup> |
| Rpl18 <sup>46,49</sup>    | <i>Rpl18</i>     | RARSRILKAGG <b>KILTFDR</b> LALAESPKGRGTVLLSGP  | Q>R        | H2-D <sup>b</sup> |
| OVA <sup>67,68</sup>      | <i>SERPINB14</i> | LLPDEVSGLEQLESI <b>INF</b> EKLTEWTSNVMEERKI    | n.a.       | H2-K <sup>b</sup> |
| Ddr2 <sup>48</sup>        | <i>Ddr2</i>      | FKEVQCYFRSE <b>SEWEPH</b> AVYFPLVLDVNPNSARF    | T>H        | I-A <sup>b</sup>  |
| Pcdh18 <sup>48</sup>      | <i>Pdch18</i>    | RFQRSRYEFVISENN <b>SPWAYIT</b> TVTATDPDLGENG   | G>W        | I-A <sup>b</sup>  |
| Zmiz1 <sup>48</sup>       | <i>Zmiz1</i>     | GIPPHT <b>RPPADFTQPAAS</b> AAAAAVAAAAATATATA   | A>S        | I-A <sup>b</sup>  |
| TTFCp30 <sup>69,70</sup>  | <i>tetX</i>      | <b>FNNFTVSFWLRVPKVSASHLE</b>                   | n.a.       | I-A <sup>b</sup>  |
| PADRE <sup>37</sup>       | <i>n.a.</i>      | <b>AKFVAAWTLKAAA</b>                           | n.a.       | I-A <sup>b</sup>  |
| HIV nef <sup>38</sup>     | <i>nef</i>       | <b>AWLEAQEEEEVGF</b>                           | n.a.       | -                 |

\* T-cell epitopes in **boldface**, mutated residues underlined.

**Table S2. Synthetic peptides used for intracellular cytokine staining (ICS) experiments**

| Antigen              | Amino Acid (AA) sequence          | Source                                     |
|----------------------|-----------------------------------|--------------------------------------------|
| Irgq                 | RDETAALLNSAVLGAAPLFV              | LUMC-Immunology synthetic peptide facility |
| Adpgk                | ELASMTNMELMSSIV                   | LUMC-Immunology synthetic peptide facility |
| Cpne1                | GSNGDPSSPYSLHYSPTGVNE             | LUMC-Immunology synthetic peptide facility |
| Rpl18                | KAGGKILTFDRALAESPK                | LUMC-Immunology synthetic peptide facility |
| OVA <sup>67,68</sup> | DEVSGLEQLESIINF <b>EKL</b> AAAAAK | LUMC-Immunology synthetic peptide facility |
| Ddr2                 | SESEWEPH <b>AVYFPLV</b> LDDVNPNS  | LUMC-Immunology synthetic peptide facility |
| Pcdh18 <sup>48</sup> | SPWAYIT <b>TVTATDPDL</b>          | LUMC-Immunology synthetic peptide facility |
| Zmiz1 <sup>48</sup>  | RPPAD <b>FTQPAAS</b> AAAAA        | LUMC-Immunology synthetic peptide facility |
| TTFCp30              | FNNFTVSFWLRVPKVSASHLE             | LUMC-Immunology synthetic peptide facility |
| PADRE                | AKFVAAWTLKAAA                     | LUMC-Immunology synthetic peptide facility |
| HIV nef              | AWLEAQEEEEVGF                     | LUMC-Immunology synthetic peptide facility |

**Table S3. Flow cytometry antibody list**

| <b>Antibodies</b>            | <b>Fluorochrome</b> | <b>Source</b>   | <b>Identifier</b> |
|------------------------------|---------------------|-----------------|-------------------|
| Fixable Viability Dye        | eF450               | Thermo Fisher   | 65-0863-14        |
| Fixable Viability Dye        | APC-eF780           | Thermo Fisher   | 65-0865-14        |
| CD3 (clone: 145-2C11)        | BV510               | BioLegend       | 100353            |
| CD3 (clone: 145-2C11)        | APC                 | Thermo Fisher   | 17-0031-83        |
| CD4 (clone: RM4-5)           | BV711               | BioLegend       | 100550            |
| CD4 (clone: GK1.5)           | AF700               | Thermo Fisher   | 56-0041-82        |
| CD4 (clone: RM4-5)           | PE-Cy7              | Invitrogen      | 25-0042-82        |
| CD8 $\alpha$ (clone: 53-6.7) | APC-eF780           | BioLegend       | 100744            |
| CD8 $\alpha$ (clone: 53-6.7) | APC-R700            | BD Sciences     | 564983            |
| CD8 $\alpha$ (clone: 53-6.7) | BUV805              | BD Horizon      | 612898            |
| CD25 (clone: PC61)           | BV711               | BioLegend       | 102049            |
| PD-1 (clone: 29F.1A12)       | BV605               | BioLegend       | 125225            |
| LAG3 (clone: C9B7W)          | PE-Cy7              | Thermo Fisher   | 12-9942-81        |
| CX3CR1 (clone: SA011F11)     | BV785               | Thermo Fisher   | 35-5893-82        |
| KLRG1 (clone: 2F1)           | FITC                | BioLegend       | 138409            |
| IL-2 (clone: JES6-5H4)       | APC                 | BD Biosciences  | 554429            |
| CD40L (clone: MR1)           | PE                  | Thermo Fisher   | 12-1541-82        |
| TNF (clone: MP6-XT22)        | FITC                | BioLegend       | 506304            |
| IFN $\gamma$ (clone: XMG1.2) | PE-Cy7              | BD Biosciences  | 557649            |
| H2-K <sup>b</sup> /SIINFEKL  | APC                 | LUMC-Immunology | tetramer facility |
| H2-K <sup>b</sup> /Rpl18     | APC                 | LUMC-Immunology | tetramer facility |
| H2-D <sup>b</sup> /Adpgk     | PE                  | LUMC-Immunology | tetramer facility |
| H2-D <sup>b</sup> /Irgq      | PE                  | LUMC-Immunology | tetramer facility |

**Table S4. Raw data of figures**
